# Supplementary material for: Comparative metagenomic analyses reveal viral-induced shifts of host metabolism towards nucleotide biosynthesis
Source: PubMed Central journal article supplement (PMC4022391; doi:10.1186/2049-2618-2-9), 2014-03-26

PYRIMIDINE METABOLISM

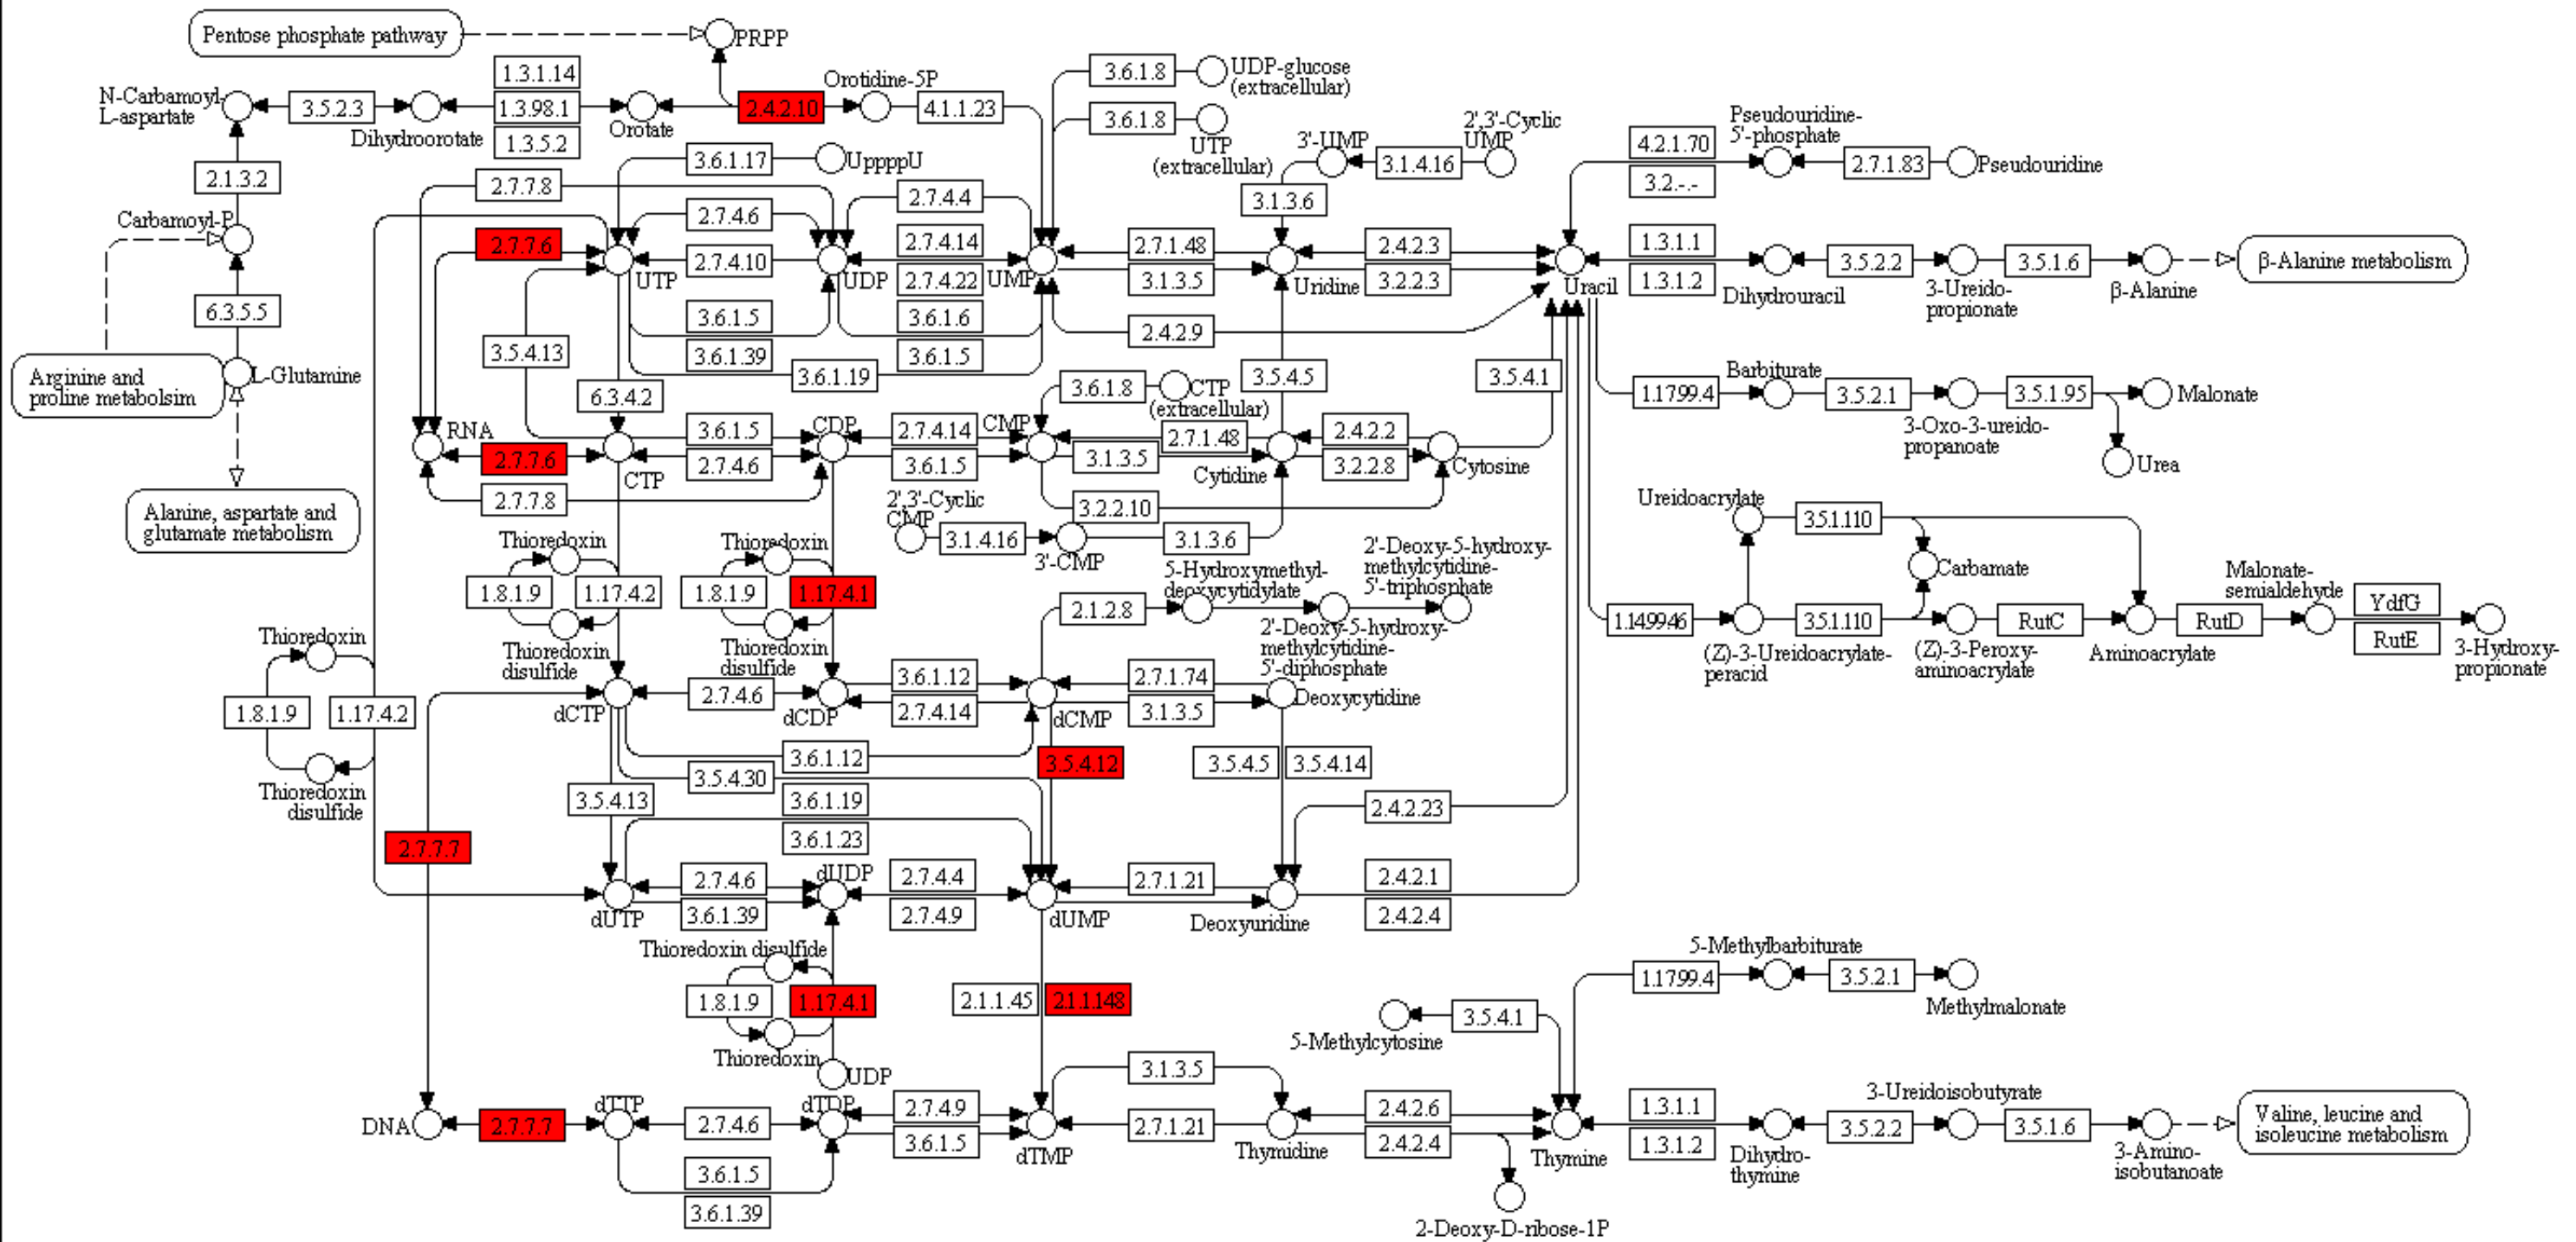

Supplement: 2049-2618-2-9-S4.pdf [file 2049-2618-2-9-S4.pdf]
